# Supplementary material for: Aggregation-Enhanced Room-Temperature Phosphorescence from Au(I) Complexes Bearing Mesogenic Biphenylethynyl Ligands
Source: Molecules. 2021 Nov 30;26(23):7255. doi: 10.3390/molecules26237255 (PMC8658970; doi:10.3390/molecules26237255)
Supplement: Supplementary file 1 [file molecules-26-07255-s001.zip › molecules-1485148-supplementary.pdf]

Supplementary materials

# Aggregation-enhanced room-temperature phosphorescence from Au(I) complexes bearing mesogenic biphenylethynyl ligands

Andriani Furoida,<sup>1</sup> Misato Daitani,<sup>1</sup> Kyohei Hisano,<sup>1</sup> and Osamu Tsutsumi<sup>1,\*</sup>

<sup>1</sup> Department of Applied Chemistry, Ritsumeikan University, 1-1-1 Nojihigashi, Kusatsu 525-8577, Japan

\* Correspondence: tsutsumi@sk.ritsumei.ac.jp

## Table of Contents

|                               |    |
|-------------------------------|----|
| 1. <sup>1</sup> H NMR spectra | S3 |
| 2. X-Ray crystallography data | S4 |
| 3. Thermochemical Properties  | S6 |
| 4. Photophysical properties   | S8 |

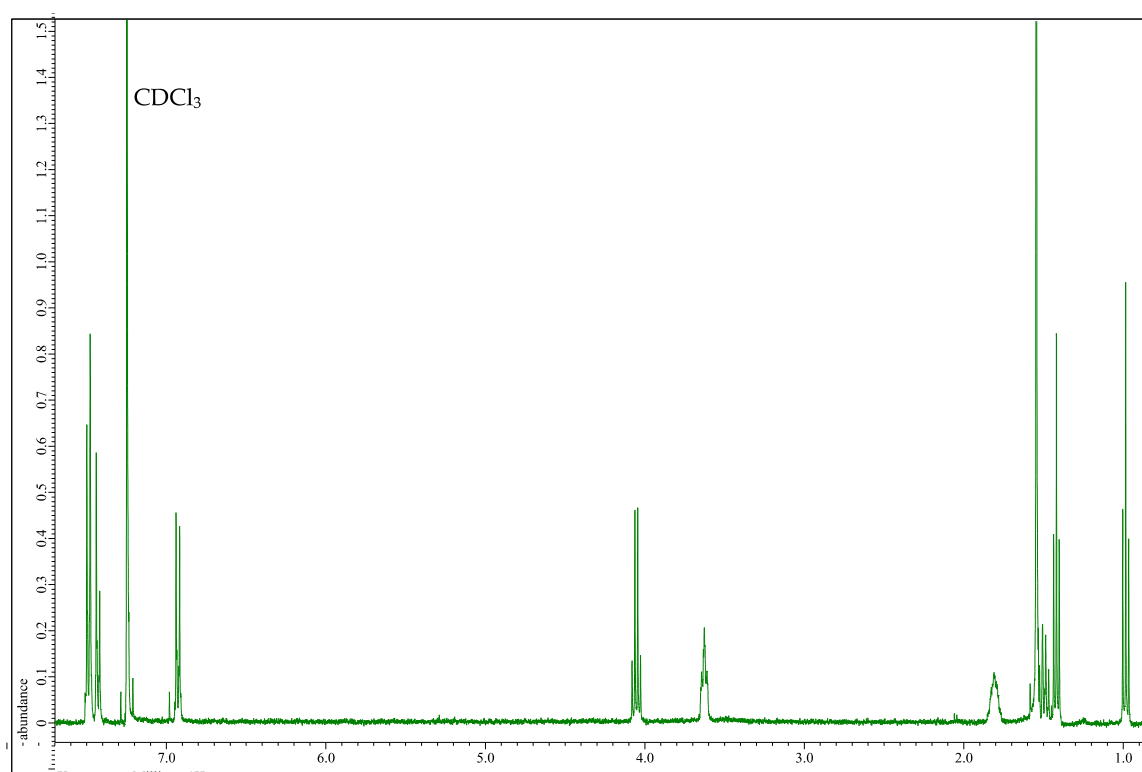Figure S1.  $^1\text{H}$  NMR spectra of B2-4.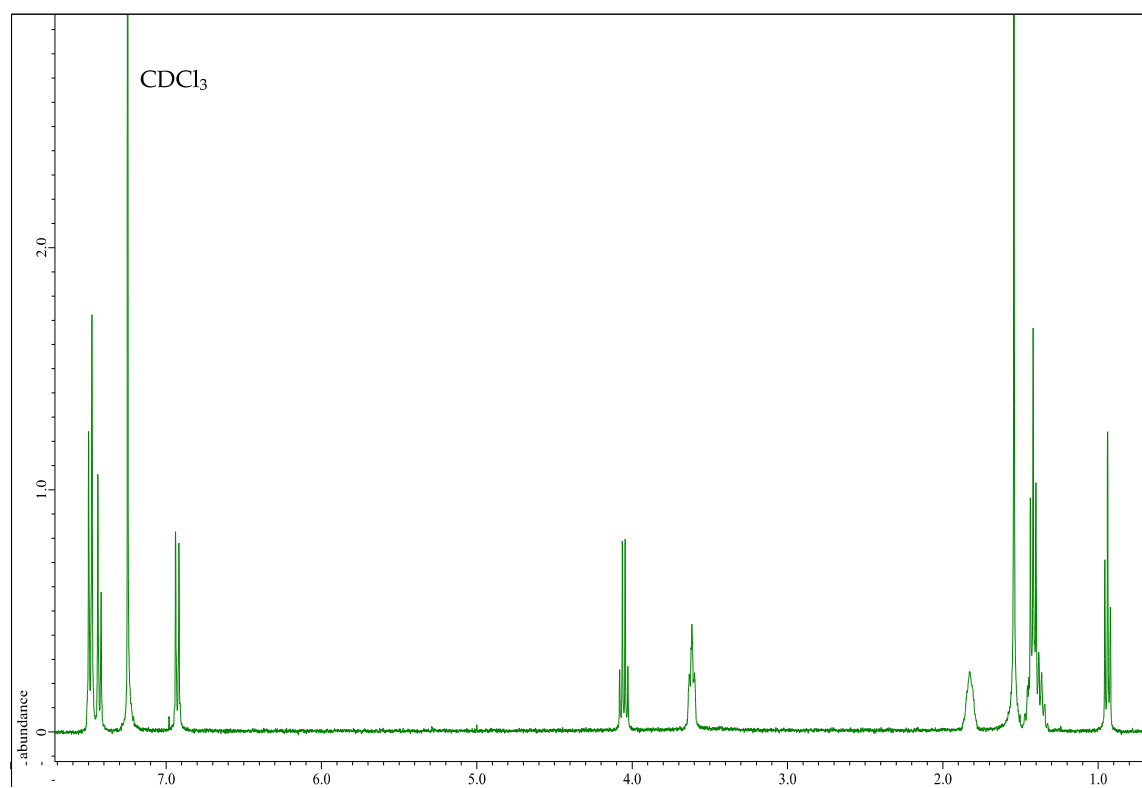Figure S2.  $^1\text{H}$  NMR spectra of B2-5.

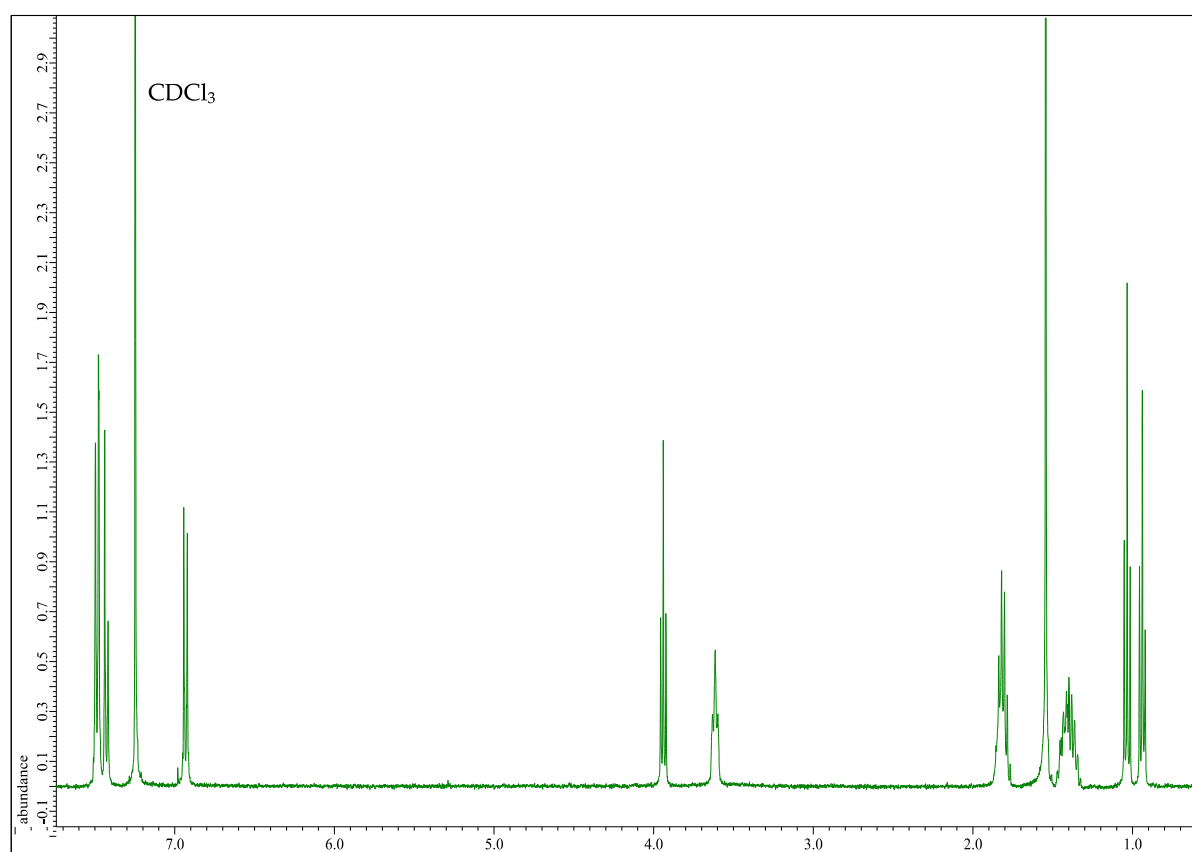

Figure S3.  $^1\text{H}$  NMR spectra of B3-5.

**Table S1.** Crystallographic data of gold(I) complexes.

|                         | <b>B2-4</b>                          | <b>B2-5</b>                          | <b>B3-5</b>                          |
|-------------------------|--------------------------------------|--------------------------------------|--------------------------------------|
| Radiation               | Mo K $\alpha$                        | Mo K $\alpha$                        | Mo K $\alpha$                        |
| Empirical formula       | C <sub>21</sub> H <sub>22</sub> AuNO | C <sub>22</sub> H <sub>24</sub> AuNO | C <sub>23</sub> H <sub>26</sub> AuNO |
| Formula weight          | 501.36                               | 515.39                               | 529.41                               |
| Temperature             | 293 K                                | 293 K                                | 293 K                                |
| Crystal color, Habit    | yellow, prism                        | yellow, prism                        | yellow, needle                       |
| Crystal Dimensions (mm) | 0.5 $\times$ 0.5 $\times$ 0.3        | 0.7 $\times$ 0.7 $\times$ 0.5        | 0.7 $\times$ 0.03 $\times$ 0.03      |
| Crystal system          | triclinic                            | triclinic                            | triclinic                            |
| $R[F^2 > 2\sigma(F^2)]$ | 0.0715,                              | 0.0475,                              | 0.0484,                              |
| $wR(F^2)$               | 0.1605                               | 0.1281                               | 0.1407                               |
| $S$                     | 1.764                                | 1.764                                | 1.670                                |
| Space group             | $P-1$                                | $P-1$                                | $P-1$                                |
| $Z$                     | 4                                    | 2                                    | 2                                    |
| $a$ (Å)                 | 10.5085 (15)                         | 7.6775 (7)                           | 8.1315 (4)                           |
| $b$ (Å)                 | 12.7427 (18)                         | 9.4496 (9)                           | 9.3466 (5)                           |
| $c$ (Å)                 | 15.0687 (18)                         | 14.1786 (19)                         | 15.5315 (8)                          |
| $\alpha$ (°)            | 110.690 (4)                          | 106.381 (4)                          | 76.587 (2)                           |
| $\beta$ (°)             | 90.119 (5)                           | 98.555 (5)                           | 85.158 (2)                           |
| $\gamma$ (°)            | 90.007 (5)                           | 93.350 (4)                           | 66.488 (2)                           |
| $V$ (Å <sup>3</sup> )   | 1887.7 (4)                           | 970.43 (18)                          | 1052.85 (10)                         |

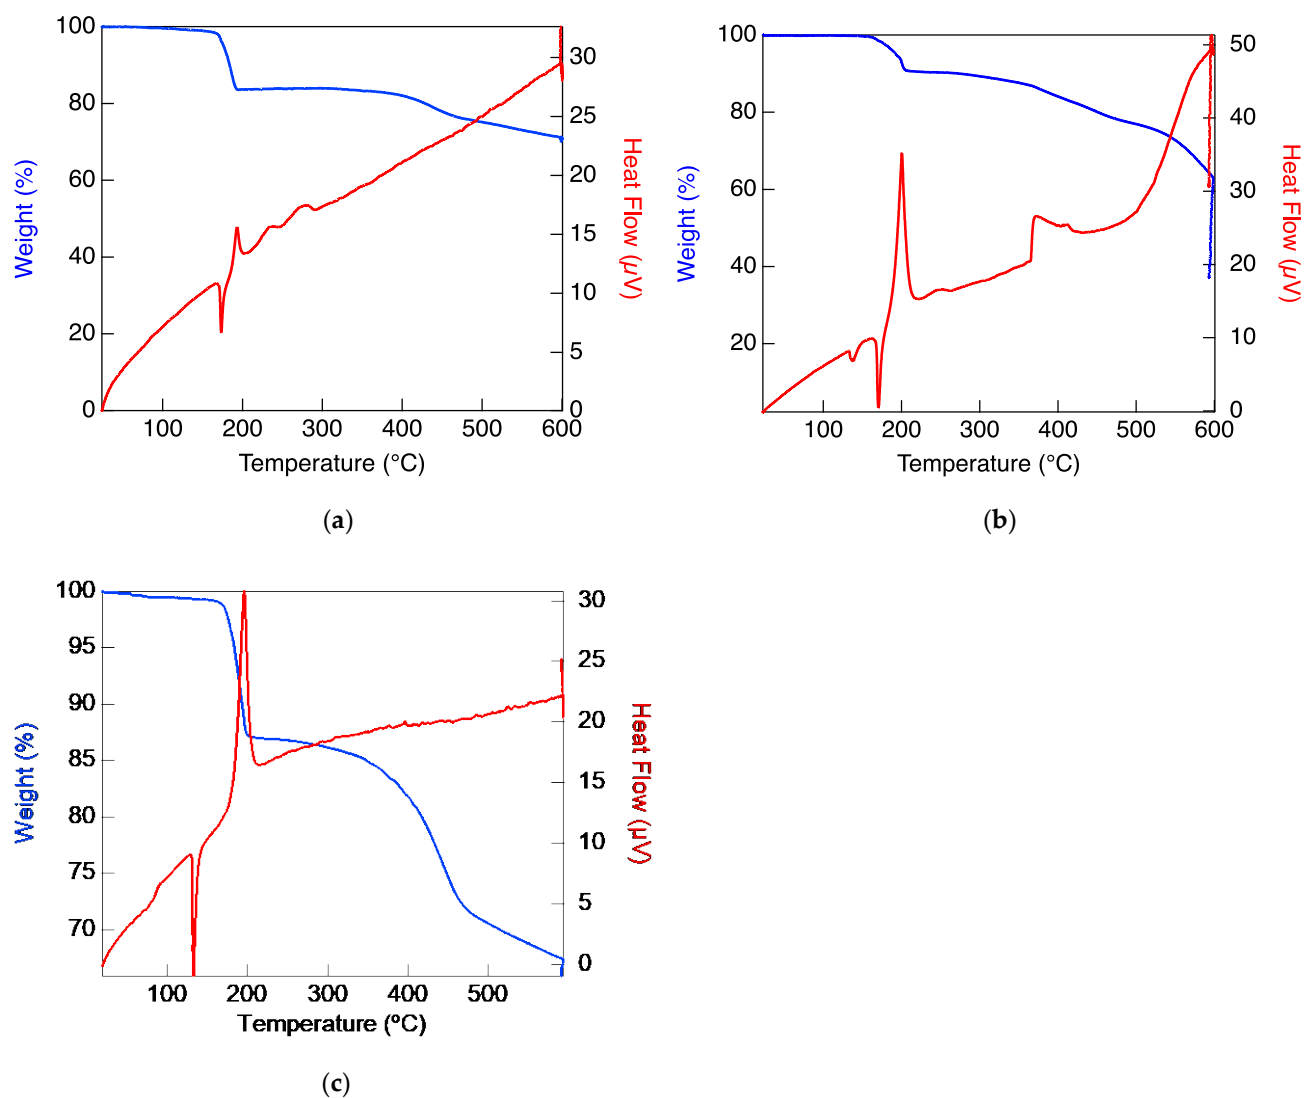

Figure S4. TG-DTA curves of (a) B2-4, (b) B2-5, and (c) B3-5 (scanning rate,  $5^{\circ}\text{C}/\text{min}$ ; red, TGA curve; blue, DTA curve).

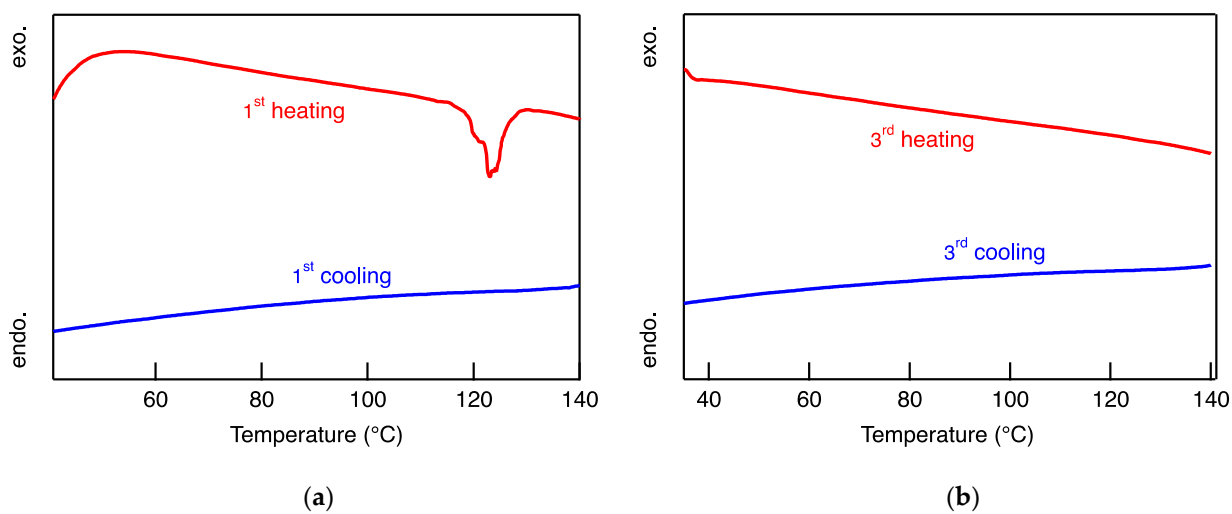

Figure S5. DSC thermograms of B2-4 in the (a) first and (b) third scanning process (scanning rate,  $5^{\circ}\text{C}/\text{min}$ ; red, heating; blue, cooling).

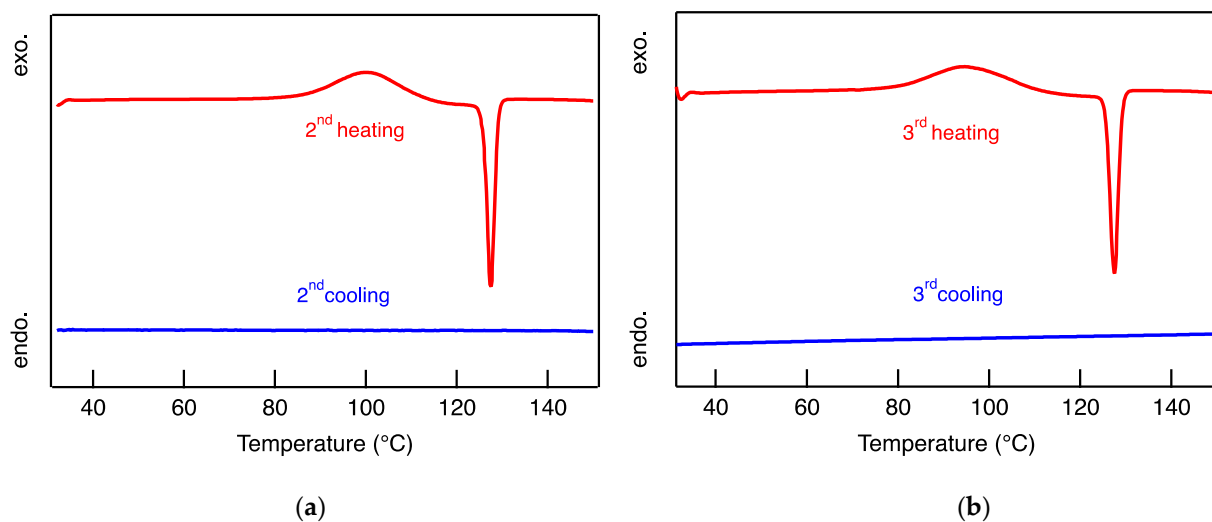

**Figure S6.** DSC thermograms of **B2-5** in the (a) second and (b) third heating-cooling process (scanning rate, 5 °C/min; red, heating; blue, cooling) and (scanning rate, 3 °C/min; red, heating; blue, cooling).

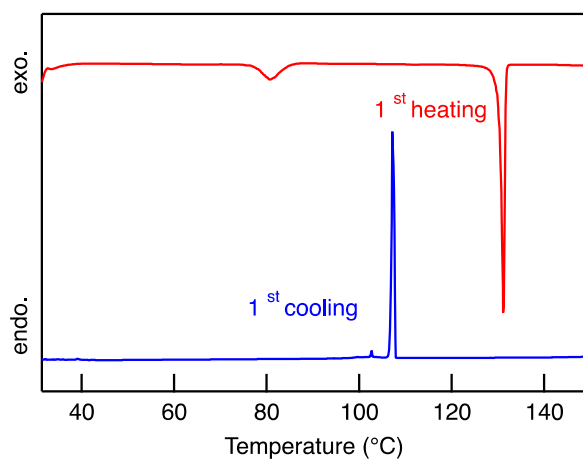

**Figure S7.** DSC thermograms of **B3-5** in the first heating-cooling process (scanning rate, 2 °C/min; red, heating; blue, cooling).

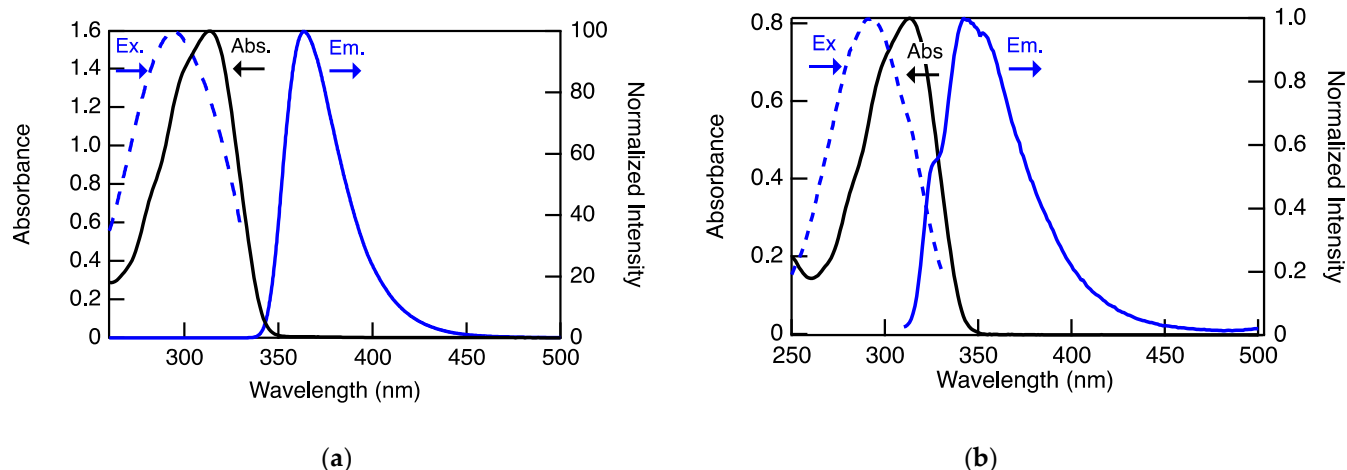

**Figure S8.** Photophysical properties of (a) **B2-4** and (b) **B3-5** in  $\text{CH}_2\text{Cl}_2$  solution: absorption, solid black line; emission, solid blue line; excitation, dashed blue line. Concentration used are  $1 \times 10^{-5} \text{ mol L}^{-1}$  for absorption, and  $1.5 \times 10^{-6} \text{ mol L}^{-1}$  for luminescence spectra. The excitation wavelength ( $\lambda_{\text{ex}}$ ) for **B2-4** and **B3-5** were 294 nm and 291 nm, respectively. Excitation spectra were obtained at 366 nm for **B2-4** and 350 nm for **B3-5**.

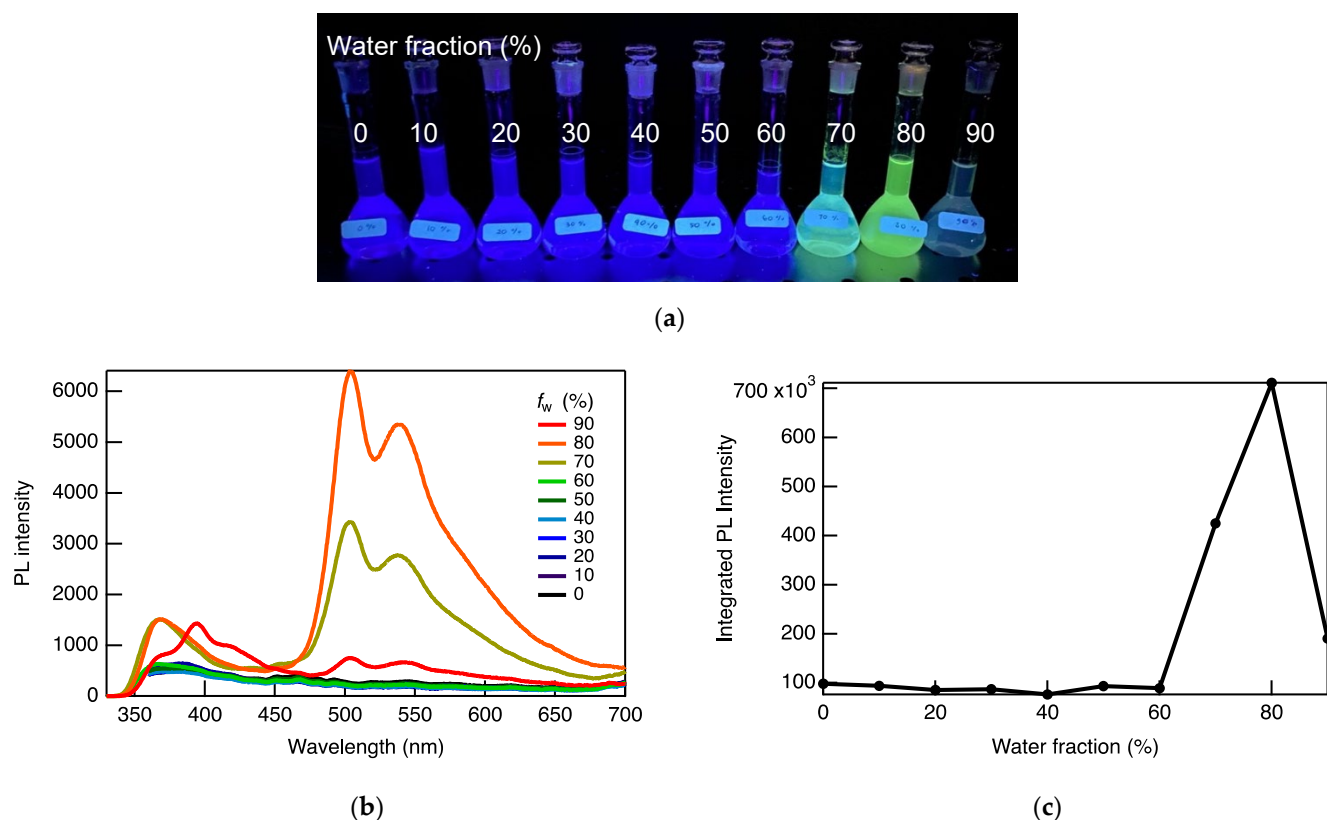

**Figure S9.** (a) Photograph of **B3-5** in  $f_w = 0\text{--}90\%$  under UV lamp at 365 nm, (b) Emission spectra of **B3-5** in  $f_w = 0\text{--}90\%$  with concentration of  $1 \times 10^{-4} \text{ mol L}^{-1}$  ( $\lambda_{\text{ex}} = 312 \text{ nm}$ ). (c) Integrated photoluminescence intensity in a range from 320 to 700 nm as a function of  $f_w$ .

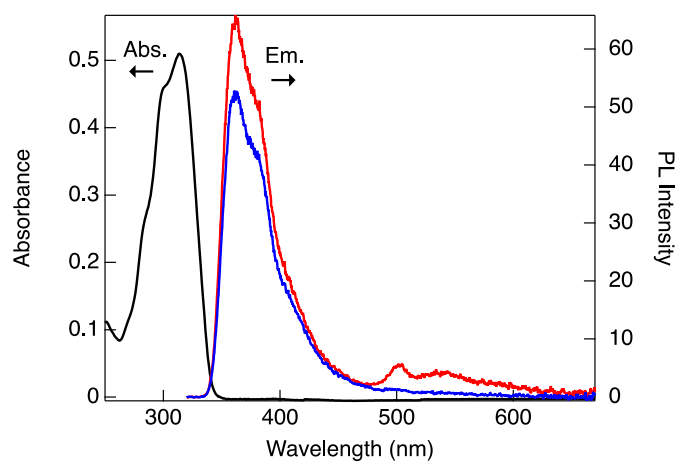

**Figure S10.** Photophysical properties of **B3-5** in THF solution. (black, absorption; blue, emission before degassing; red, emission after degassing). The excitation wavelength ( $\lambda_{\text{ex}}$ ) was 280 nm. UV-Vis absorption concentrations:  $1 \times 10^{-5}$ , luminescence concentration:  $1.5 \times 10^{-6} \text{ mol L}^{-1}$ .

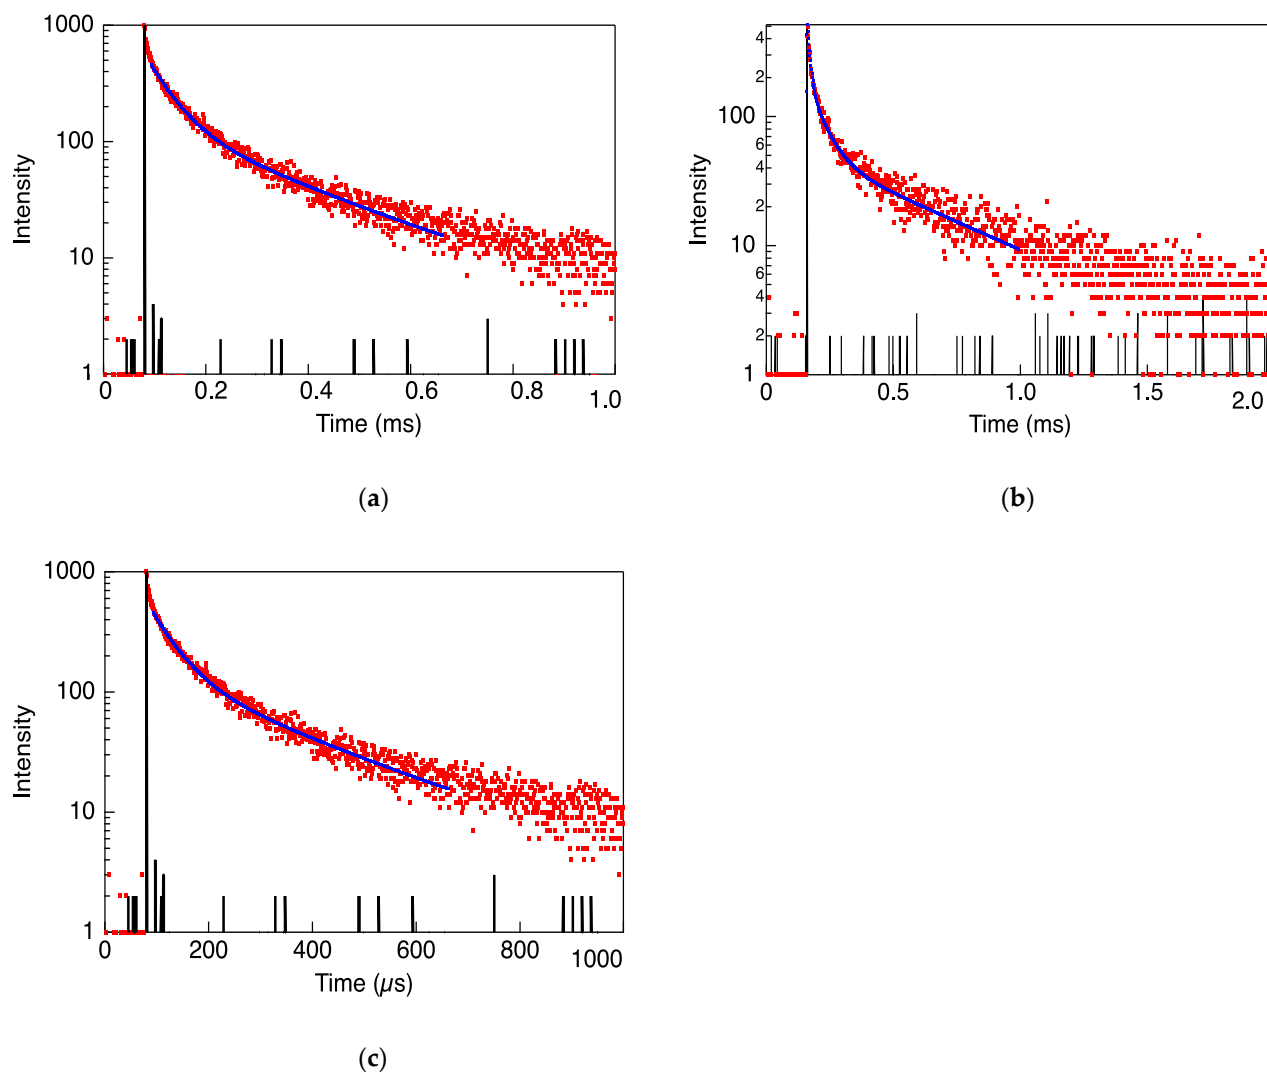

**Figure S11.** Decay profiles of (a) **B2-4**, (b) **B2-5**, (c) **B3-5** crystal at 500 nm emission ( $\lambda_{\text{ex}} = 340 \text{ nm}$ ). Red, emission lifetime decay; black, IRF; blue, curve fitting.
